# Supplementary material for: Label-free and real-time monitoring of trypsin activity in living cells by quantum-dot-based fluorescent sensors
Source: Royal Society of Chemistry journal article supplement (doi:10.1039/c3ay41793j), 2014-01-01
Supplement: c3ay41793j.pdf [file c3ay41793j.pdf]

## Supplementary Information

### Label-free and real-time monitoring of trypsin activity in living cells by quantum-dot-based fluorescent sensors

Wenzhu Zhang,<sup>a</sup> Ping Zhang,<sup>a</sup> Shengzhou Zhang<sup>\*b</sup> and Changqing Zhu<sup>\*a</sup>

<sup>a</sup>Anhui Key Laboratory of Chemo-Biosensing, College of Chemistry and Materials Science, Anhui Normal University, Wuhu, 241000, P. R. China. E-mail: zhucq@mail.ahnu.edu.cn

<sup>b</sup>Anhui Key Laboratory of Biotic Environment and Ecological safety, College of Life Science, Anhui Normal University, Wuhu, 241000, P. R. China. E-mail: szzhang@mail.ahnu.edu.cn

### Supporting Results

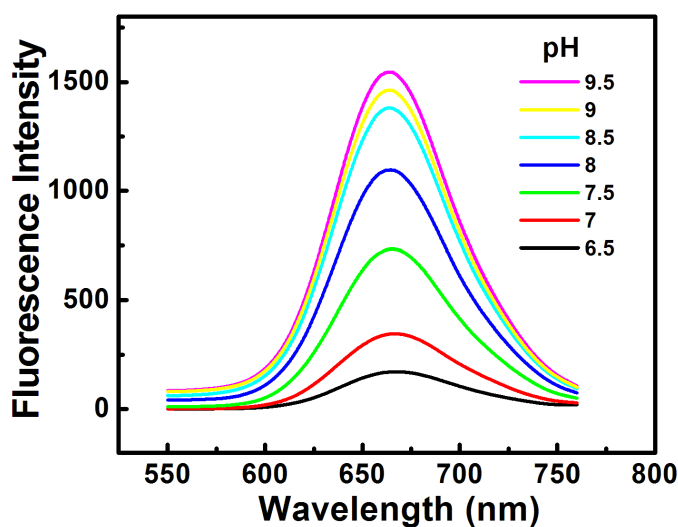

**Fig. S1** The fluorescence emission spectrum of GSH-CdTe QDs (53.4 nM) at different pH values.

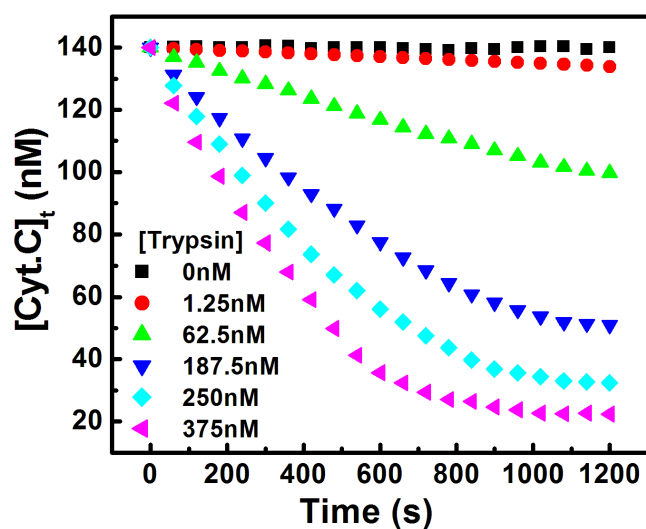

**Fig. S2** The concentration of cyt.c during the trypsin assay as a function of digestion time at different concentrations of trypsin. Solution conditions: the complex of QDs (53.4 nM) and cyt.c (140 nM) was incubated with different trypsin concentrations in 50 mM Tris-HCl buffer (pH 8.5) at 37 °C.

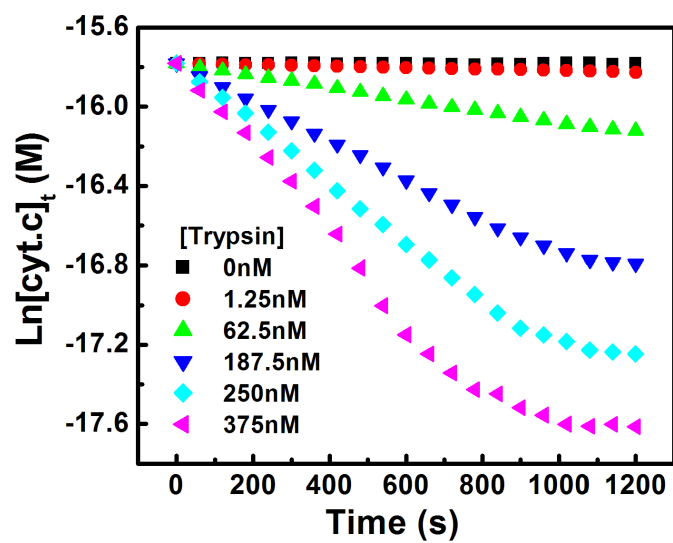

**Fig. S3** Natural logarithm of  $[\text{cyt.c}]_t$  as a function of digestion time at different concentrations of trypsin. Solution conditions: the complex of QDs (53.4 nM) and cyt.c (140 nM) was incubated with different trypsin concentrations in 50 mM Tris-HCl buffer (pH 8.5) at 37 °C.
